# Supplementary material
Source: HighWire-hosted journal article supplement (https://rmdopen.bmj.com/content/8/2/e001944)
Supplement: inline-supplementary-material-1 [file inline-supplementary-material-1.pdf]

Supplementary Table 1. Cardiovascular events during drug administration and after discontinuation according to primary reasons behind study drug not being completed.

| Characteristics                                                          | Modified ITT (n = 6190)    |                                                     |                                        |
|--------------------------------------------------------------------------|----------------------------|-----------------------------------------------------|----------------------------------------|
|                                                                          | No CV event*<br>(n = 5534) | CV event*<br>During<br>administration†<br>(n = 448) | After<br>discontinuation†<br>(n = 208) |
| <b>Primary Reason Study Drug Not Completed</b>                           |                            |                                                     |                                        |
| Completed study drug                                                     | 2529 (45.7)                | 158 (35.3)                                          | 2 (1.0)                                |
| Discontinued study drug                                                  |                            |                                                     |                                        |
| - Pretreatment Event/Adverse Event                                       | 615 (11.1)                 | 161 (35.9)                                          | 122 (58.7)                             |
| - Major Protocol Deviation                                               | 186 (3.4)                  | 5 (1.1)                                             | 9 (4.3)                                |
| - Lost to Follow-Up                                                      | 397 (7.2)                  | 17 (3.8)                                            | 4 (1.9)                                |
| - Voluntary Withdrawal                                                   | 1267 (22.9)                | 64 (14.3)                                           | 34 (16.3)                              |
| - Other                                                                  | 540 (9.8)                  | 43 (9.6)                                            | 37 (17.8)                              |
| <b>Last medication date ~ last contact date (days),<br/>Median (IQR)</b> |                            |                                                     |                                        |
| Completed study drug                                                     | 1 (1 - 1)                  | 1 (1 - 1)                                           | 63 (35 - 91)                           |
| Discontinued study drug                                                  |                            |                                                     |                                        |
| - Pretreatment Event/Adverse Event                                       | 158 (16 - 757)             | 6 (1 - 86)                                          | 113 (46 - 444)                         |
| - Major Protocol Deviation                                               | 111 (1 - 779)              | 78 (21 - 249)                                       | 1157 (851 - 1395)                      |
| - Lost to Follow-Up                                                      | 1 (0 - 57)                 | 5 (1 - 234)                                         | 428 (311 - 862)                        |
| - Voluntary Withdrawal                                                   | 61 (1 - 377)               | 112 (10 - 196)                                      | 545 (189 - 1091)                       |
| - Other                                                                  | 40 (1 - 558)               | 3 (1 - 130)                                         | 149 (73 - 707)                         |

Supplementary Table 2. Baseline characteristics of patients with no abnormal clinical or vital signs during the study visits

| Characteristics                                                                                                           | No CV event*<br>(n = 2315) | CV event*                           |                                    | P-value* | P-value† |
|---------------------------------------------------------------------------------------------------------------------------|----------------------------|-------------------------------------|------------------------------------|----------|----------|
|                                                                                                                           |                            | During administration†<br>(n = 138) | After discontinuation†<br>(n = 64) |          |          |
| Treatment, n (%)                                                                                                          |                            |                                     |                                    | 0.901    | 1.0000   |
| Febuxostat                                                                                                                | 1164 (50.3)                | 70 (50.7)                           | 34 (53.1)                          |          |          |
| Allopurinol                                                                                                               | 1151 (49.7)                | 68 (49.3)                           | 30 (46.9)                          |          |          |
| Median age, year (IQR)                                                                                                    | 63.0 (58.0–70.0)           | 65.0 (59.0–71.0)                    | 68.0 (62.0–73.0)                   | 0.0003   | 0.0809   |
| Age ≥ 65, n (%)                                                                                                           | 1060 (45.8)                | 71 (51.8)                           | 43 (67.2)                          | 0.0015   | 0.1217   |
| Male, n (%)                                                                                                               | 1954 (84.4)                | 125 (90.6)                          | 57 (89.1)                          | 0.0923   | 1.0000   |
| Median duration of gout, year (QI)                                                                                        | 7.7 (3.2–17.2)             | 8.8 (3.3–18.7)                      | 6.8 (2.3–19.7)                     | 0.6880   | 0.8179   |
| No. of sUA tests for each subject collected from the end of the first year of treatment until 1 day after last dose date  | 5.0 (3.0–8.0)              | 6.0 (3.0–9.0)                       | 4.0 (3.0–6.0)                      | 0.0136   | 0.0272   |
| Average sUA value for each subject collected from the end of the first year of treatment until 1 day after last dose date | 5.3 (4.6–6.2)              | 5.4 (4.7–6.0)                       | 5.3 (4.6–6.4)                      | 0.8385   | 0.9125   |
| Baseline serum urate level, mean ± SD                                                                                     | 8.6 ± 1.6                  | 8.9 ± 1.6                           | 9.2 ± 1.7                          | 0.0017   | 0.4299   |
| Median no. of gout flares (IQR)                                                                                           | 2.0 (1.0–4.0)              | 3.0 (2.0–5.0)                       | 2.0 (2.0–5.0)                      | 0.0257   | 0.8516   |
| Presence of tophi, n (%)                                                                                                  | 468 (20.2)                 | 23 (16.7)                           | 18 (28.1)                          | 0.1687   | 0.1788   |
| Median no. of tophi (IQR)                                                                                                 | 2.0 (1.0–4.0)              | 2.0 (1.0–3.0)                       | 2.0 (2.0–5.0)                      | 0.2528   | 0.2473   |
| Median body weight, kg (IQR)                                                                                              | 96.8 (84.0–112.6)          | 100.9 (91.0–121.0)                  | 104.1 (91.6–119.3)                 | 0.0007   | 0.6873   |
| Body mass index                                                                                                           | 33.4 ± 6.8                 | 34.0 ± 6.7                          | 35.6 ± 8.7                         | 0.0225   | 0.2639   |
| Race or ethnic group, n (%)                                                                                               |                            |                                     |                                    | <0.0001  | 0.1728   |
| American Indian or Alaska Native                                                                                          | 253 (10.9)                 | 0 (0.0)                             | 4 (6.3)                            |          |          |
| Asian                                                                                                                     | 75 (3.2)                   | 3 (2.2)                             | 2 (3.1)                            |          |          |
| Black or African American                                                                                                 | 424 (18.3)                 | 17 (12.3)                           | 9 (14.1)                           |          |          |
| Native Hawaiian or Other Pacific Islander                                                                                 | 11 (0.5)                   | 2 (1.4)                             | 0 (0.0)                            |          |          |
| White                                                                                                                     | 1542 (66.6)                | 114 (82.6)                          | 49 (76.6)                          |          |          |
| Other                                                                                                                     | 10 (0.4)                   | 2 (1.4)                             | 0 (0.0)                            |          |          |
| Cardiovascular risk factors and history, n (%)                                                                            |                            |                                     |                                    |          |          |
| DM with small-vessel disease                                                                                              | 927 (40.0)                 | 45 (32.6)                           | 30 (46.9)                          | 0.1123   | 0.1526   |
| Hypertension                                                                                                              | 2084 (90.0)                | 129 (93.5)                          | 62 (96.9)                          | 0.0832   | 1.0000   |

|                                                                     |                      |                       |                      |         |         |
|---------------------------------------------------------------------|----------------------|-----------------------|----------------------|---------|---------|
| Hyperlipidemia                                                      | 1985 (85.7)          | 128 (92.8)            | 56 (87.5)            | 0.0650  | 0.6682  |
| Myocardial infarction                                               | 815 (35.2)           | 73 (52.9)             | 27 (42.2)            | <0.0001 | 0.4698  |
| Hospitalization for unstable angina                                 | 580 (25.1)           | 55 (39.9)             | 18 (28.1)            | 0.0005  | 0.3192  |
| Coronary revascularization                                          | 783 (33.8)           | 74 (53.6)             | 29 (45.3)            | <0.0001 | 0.8149  |
| Cerebral revascularization                                          | 30 (1.3)             | 3 (2.2)               | 4 (6.3)              | 0.0141  | 0.6332  |
| Congestive heart failure                                            | 365 (15.8)           | 37 (26.8)             | 19 (29.7)            | <0.0001 | 1.0000  |
| Stroke                                                              | 288 (12.4)           | 30 (21.7)             | 9 (14.1)             | 0.0066  | 0.5953  |
| Peripheral vascular disease                                         | 264 (11.4)           | 18 (13.0)             | 12 (18.8)            | 0.1720  | 0.8659  |
| Median estimated creatinine clearance                               |                      |                       |                      |         |         |
| Stage 1 or 2 chronic kidney disease                                 | 74.0 (66.0–84.0)     | 72.0 (66.0–82.0)      | 71.0 (66.0–82.0)     | 0.5480  | 0.9822  |
| Stage 3 chronic kidney disease                                      | 46.0 (40.0–53.0)     | 46.0 (38.0–53.0)      | 43.0 (37.0–52.0)     | 0.2617  | 0.5824  |
| Stage of chronic kidney disease, no./total no. (%)                  |                      |                       |                      | <0.0001 | 0.1112  |
| Stage 1 or 2                                                        | 1221/2311 (52.8)     | 60/138 (43.5)         | 18/64 (28.1)         |         |         |
| Stage 3                                                             | 1090/2311 (47.2)     | 78/138 (56.5)         | 46/64 (71.9)         |         |         |
| Primary reason study drug not completed                             |                      |                       |                      | <0.0001 | <0.0001 |
| Completed study drug                                                | 1297 (56.0)          | 53 (38.4)             | 0 (0.0)              |         |         |
| Discontinued study drug                                             |                      |                       |                      |         |         |
| Adverse events                                                      | 138 (6.0)            | 36 (26.1)             | 36 (56.3)            |         |         |
| Major protocol deviation                                            | 77 (3.3)             | 1 (0.7)               | 2 (3.1)              |         |         |
| Lost to follow-up                                                   | 109 (4.7)            | 6 (4.3)               | 1 (1.6)              |         |         |
| Voluntary withdrawal                                                | 470 (20.3)           | 27 (19.6)             | 9 (14.1)             |         |         |
| Other                                                               | 224 (9.7)            | 15 (10.9)             | 16 (25.0)            |         |         |
| Median duration of treatment, day (IQR)                             | 833.0 (457.0–1454.0) | 1238.5 (676.0–1752.0) | 729.5 (394.0–1109.0) | <0.0001 | <0.0001 |
| Last clinical sign date – last medication date (days), median (IQR) | -1.0 (-1.0–0.0)      | 0.0 (-1.0–182.0)      | 16.0 (0.0–178.0)     | <0.0001 | 0.1090  |
| Last vital date – last medication date (days), median (IQR)         | -1.0 (-1.0–0.0)      | 0.0 (-1.0–103.0)      | 0.0 (0.0–50.5)       | <0.0001 | 0.5928  |
| Last medication date – last contact date (days), median (IQR)       | 1.0 (1.0–24.0)       | 1.0 (1.0–68.0)        | 112.5 (35.5–407.0)   | <0.0001 | <0.0001 |
| Last clinical sign date – last medication date (days), median (IQR) |                      |                       |                      |         |         |
| Completed study drug                                                | -1 (-1–[-1])         | -1 (-1–[-1])          | -                    | 0.4708  |         |
| Discontinued study drug                                             |                      |                       |                      |         |         |
| Adverse events                                                      | 28 (0–182)           | 162 (46–236)          | 101 (0–185)          | 0.0107  | 0.1156  |
| Major protocol                                                      | -1 (-1–0)            | 290 (290–290)         | 4 (0–8)              | 0.0901  | 0.4385  |

|                                                               |              |               |                |         |        |
|---------------------------------------------------------------|--------------|---------------|----------------|---------|--------|
| deviation                                                     |              |               |                |         |        |
| Lost to follow-up                                             | 181 (4–199)  | 150 (90–198)  | 379 (379–379)  | 0.2467  | 0.2909 |
| Voluntary withdrawal                                          | 0 (-1–196)   | 88 (0–200)    | 0 (0–60)       | 0.2991  | 0.1798 |
| Other                                                         | 0 (-1–171)   | 74 (-1–296)   | 0 (0–105)      | 0.4384  | 0.9507 |
| Last vital date – last medication date (days), median (IQR)   |              |               |                |         |        |
| Completed study drug                                          | -1 (-1–[-1]) | -1 (-1–[-1])  | -              | 0.5013  |        |
| Discontinued study drug                                       |              |               |                |         |        |
| Adverse events                                                | 14 (0–74)    | 97 (30–158)   | 0 (0–46)       | 0.0001  | 0.0005 |
| Major protocol deviation                                      | -1 (-1–0)    | 104 (104–104) | 4 (0–8)        | 0.0751  | 0.4385 |
| Lost to follow-up                                             | 0 (0–151)    | 110 (0–171)   | 199 (199–199)  | 0.2863  | 0.4172 |
| Voluntary withdrawal                                          | 0 (-1–126)   | 54 (0–154)    | 0 (0–60)       | 0.1932  | 0.3902 |
| Other                                                         | 0 (-1–83)    | 49 (-1–125)   | 0 (0–25)       | 0.6203  | 0.8778 |
| Last medication date – last contact date (days), median (IQR) |              |               |                |         |        |
| Completed study drug                                          | 1 (1–1)      | 1 (1–1)       | -              | 0.1947  |        |
| Discontinued study drug                                       |              |               |                |         |        |
| Adverse events                                                | 197 (21–757) | 1 (0–69)      | 54 (21–134)    | <0.0001 | 0.0035 |
| Major protocol deviation                                      | 4 (1–427)    | 21 (21–21)    | 807 (763–851)  | 0.2875  | 0.4385 |
| Lost to follow-up                                             | 1 (0–99)     | 3 (1–450)     | 414 (414–414)  | 0.2034  | 0.8691 |
| Voluntary withdrawal                                          | 34 (1–373)   | 112 (4–414)   | 863 (189–1091) | 0.0084  | 0.0102 |
| Other                                                         | 15 (1–420)   | 1 (1–158)     | 160 (84–554)   | 0.0311  | 0.0242 |

P-value by chi-square test, Fisher's exact test, ANOVA, or Kruskal–Wallis test

†Adjusted P-value by chi-square test, Fisher's exact test with Bonferroni adjustment method, Dwass, Steel, Critchlow–Fligner multiple comparison, or Tukey's multiple comparison method.

Supplementary Figure 1. Cumulative Kaplan–Meier estimates of the time from febuxostat and allopurinol discontinuation to the first occurrence of a MACE (all study patients)

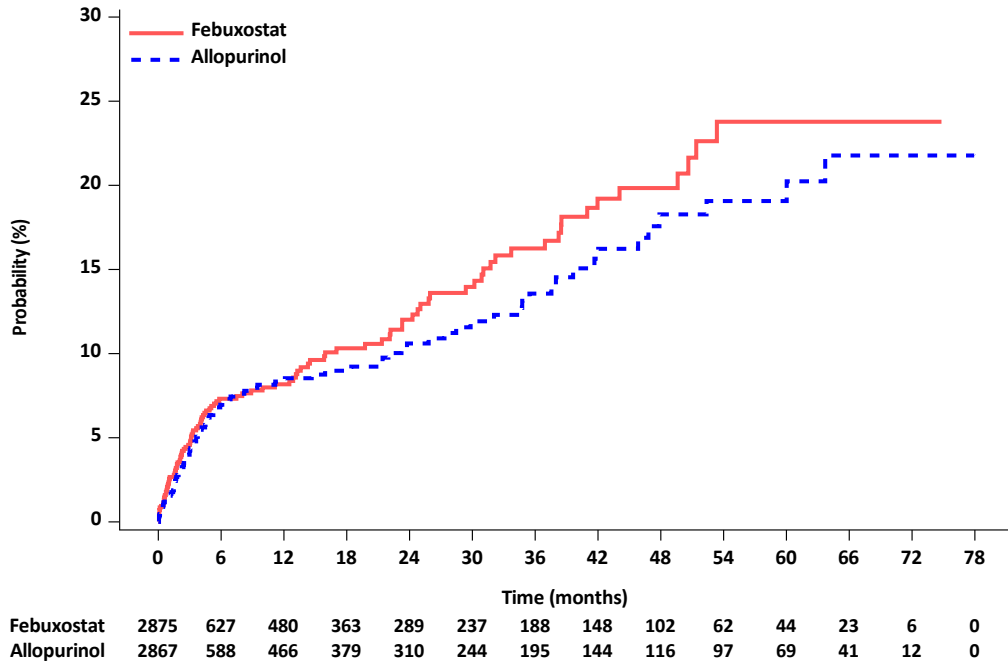

Supplementary Figure 2. Cumulative Kaplan–Meier estimates of the time to the first occurrence of an adjudicated MACE (during 6 months)

a. All study patients

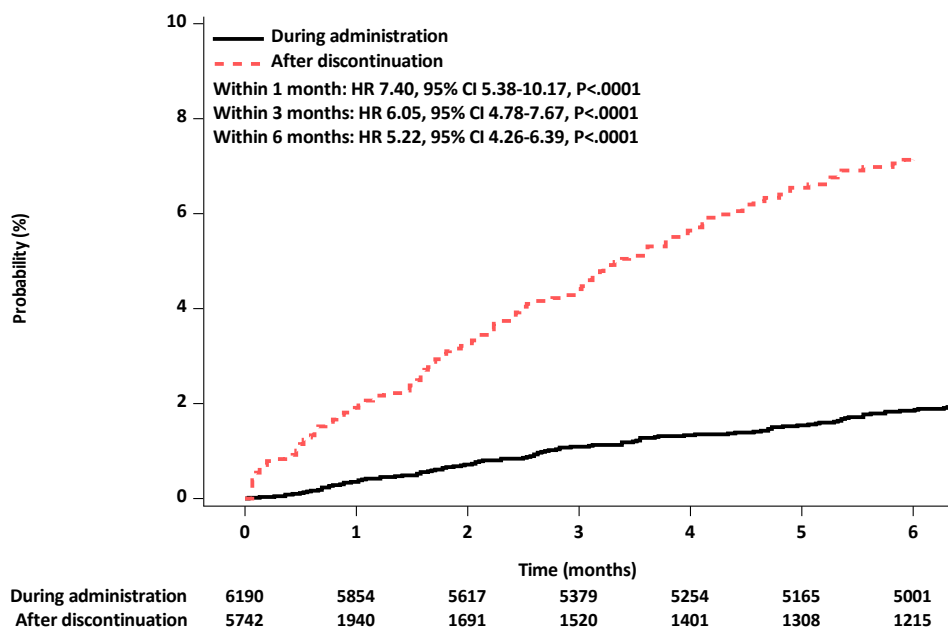

b. Study patients with no abnormal clinical or vital signs during any of the study visits

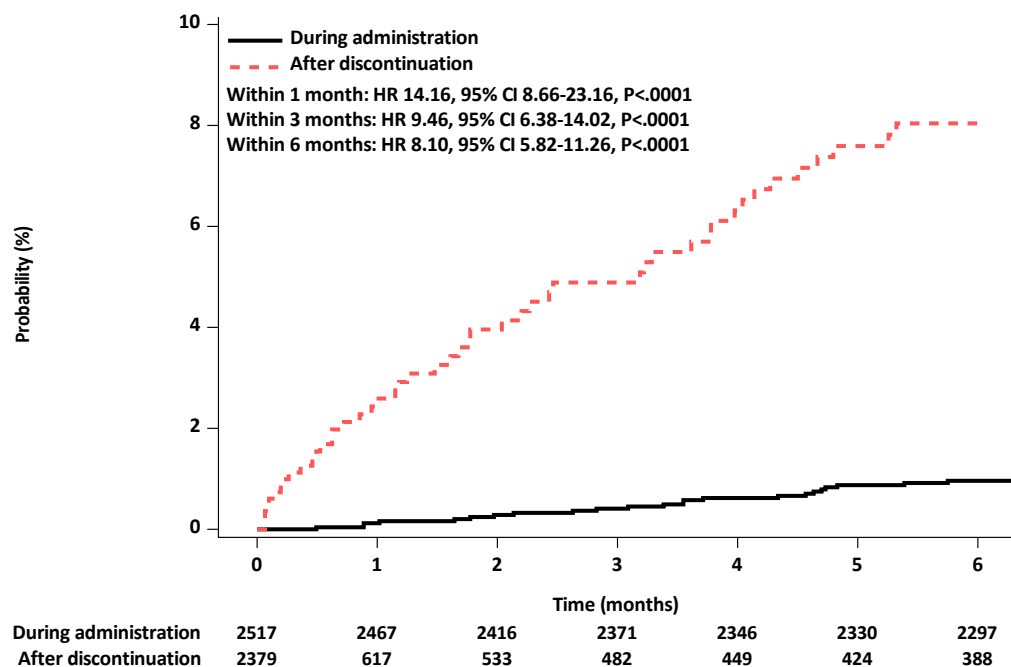

- c. Study patients who were followed up for more than 1 month after discontinuing the study drug (among the excluded patients; all patients with MACEs during administration and after discontinuation are included)

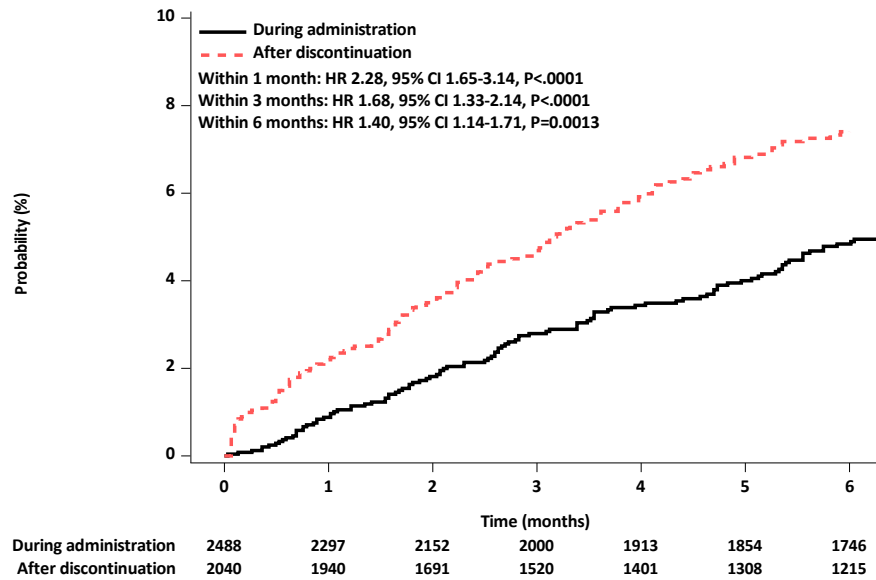

- d. Study patients with no abnormal clinical or vital signs during the study visits (among the excluded patients; patients with MACEs during administration are only included in the ‘during administration’ group)

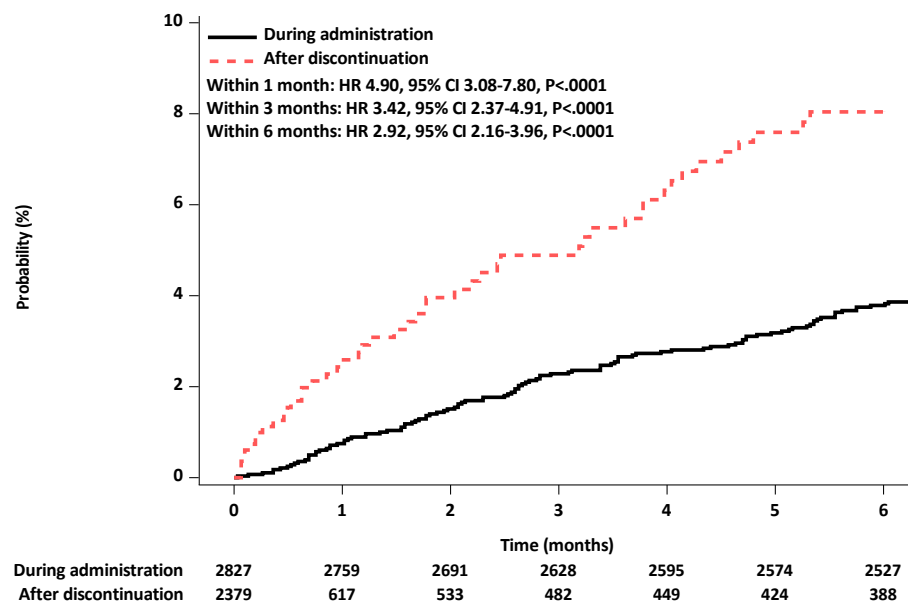

Supplementary Table 3. Comparative risk of MACEs between during administration and after discontinuation of the study drug (during 6 months; table of Supplementary Figure 2)

## a. All study patients

| Last study drug stop   | No. of events | Person-years | Incidence rates per 100 person-years | IRR (95% CI)      | P-value | HR (95% CI)       | P-value |
|------------------------|---------------|--------------|--------------------------------------|-------------------|---------|-------------------|---------|
| Within 1 month         |               |              |                                      |                   |         |                   |         |
| -During administration | 448           | 14424        | 3.11 (2.83–3.41)                     | 1 (Ref)           |         | 1 (Ref)           |         |
| -After discontinuation | 44            | 190          | 23.13 (17.21–31.07)                  | 7.45 (5.46–10.15) | <0.0001 | 7.40 (5.38–10.17) | <0.0001 |
| Within 3 months        |               |              |                                      |                   |         |                   |         |
| -During administration | 448           | 14424        | 3.11 (2.83–3.41)                     | 1 (Ref)           |         | 1 (Ref)           |         |
| -After discontinuation | 88            | 473          | 18.61 (15.10–22.94)                  | 5.99 (4.77–7.53)  | <0.0001 | 6.05 (4.78–7.67)  | <0.0001 |
| Within 6 months        |               |              |                                      |                   |         |                   |         |
| -During administration | 448           | 14424        | 3.11 (2.83–3.41)                     | 1 (Ref)           |         | 1 (Ref)           |         |
| -After discontinuation | 128           | 812          | 15.77 (13.26–18.76)                  | 5.08 (4.17–6.18)  | <0.0001 | 5.22 (4.26–6.39)  | <0.0001 |



## b. Study patients with no abnormal clinical or vital signs during any of the study visits

| Last study drug stop   | No. of events | Person-years | Incidence rates per 100 person-years | IRR (95% CI)       | P-value | HR (95% CI)        | P-value |
|------------------------|---------------|--------------|--------------------------------------|--------------------|---------|--------------------|---------|
| <b>Total</b>           |               |              |                                      |                    |         |                    |         |
| -During administration | 138           | 6569         | 2.10 (1.78–2.48)                     | 1 (Ref)            |         | 1 (Ref)            |         |
| -After discontinuation | 64            | 942          | 6.79 (5.32–8.68)                     | 3.23 (2.40–4.35)   | <0.0001 | 3.01 (2.18–4.17)   | <0.0001 |
| <b>Within 1 month</b>  |               |              |                                      |                    |         |                    |         |
| -During administration | 138           | 6569         | 2.10 (1.78–2.48)                     | 1 (Ref)            |         | 1 (Ref)            |         |
| -After discontinuation | 19            | 62           | 30.54 (19.48–47.87)                  | 14.54 (9.00–23.48) | <0.0001 | 14.16 (8.66–23.16) | <0.0001 |
| <b>Within 3 months</b> |               |              |                                      |                    |         |                    |         |
| -During administration | 138           | 6569         | 2.10 (1.78–2.48)                     | 1 (Ref)            |         | 1 (Ref)            |         |
| -After discontinuation | 32            | 151          | 21.17 (14.97–29.93)                  | 10.07 (6.86–14.80) | <0.0001 | 9.46 (6.38–14.02)  | <0.0001 |
| <b>Within 6 months</b> |               |              |                                      |                    |         |                    |         |
| -During administration | 138           | 6569         | 2.10 (1.78–2.48)                     | 1 (Ref)            |         | 1 (Ref)            |         |
| -After discontinuation | 47            | 260          | 18.09 (13.59–24.08)                  | 8.61 (6.18–11.99)  | <0.0001 | 8.10 (5.82–11.26)  | <0.0001 |

- c. Study patients who were followed up for more than 1 month after discontinuing the study drug (among the excluded patients, all patients with MACEs during administration and after discontinuation are included)

| Last study drug stop   | No. of events | Person-years | Incidence rates per 100 person-years | IRR (95% CI)     | P-value | HR (95% CI)      | P-value |
|------------------------|---------------|--------------|--------------------------------------|------------------|---------|------------------|---------|
| <b>Total</b>           |               |              |                                      |                  |         |                  |         |
| -During administration | 448           | 3905         | 11.47 (10.46–12.59)                  | 1 (Ref)          |         | 1 (Ref)          |         |
| -After discontinuation | 208           | 3075         | 6.76 (5.91–7.75)                     | 0.59 (0.50–0.70) | <0.0001 | 0.55 (0.45–0.66) | <0.0001 |
| <b>Within 1 month</b>  |               |              |                                      |                  |         |                  |         |
| -During administration | 448           | 3905         | 11.47 (10.46–12.59)                  | 1 (Ref)          |         | 1 (Ref)          |         |
| -After discontinuation | 44            | 164          | 26.79 (19.94–36.00)                  | 2.33 (1.71–3.18) | <0.0001 | 2.28 (1.65–3.14) | <0.0001 |
| <b>Within 3 months</b> |               |              |                                      |                  |         |                  |         |
| -During administration | 448           | 3905         | 11.47 (10.46–12.59)                  | 1 (Ref)          |         | 1 (Ref)          |         |
| -After discontinuation | 88            | 447          | 19.69 (15.98–24.27)                  | 1.72 (1.37–2.16) | <0.0001 | 1.68 (1.33–2.14) | <0.0001 |
| <b>Within 6 months</b> |               |              |                                      |                  |         |                  |         |
| -During administration | 448           | 3905         | 11.47 (10.46–12.59)                  | 1 (Ref)          |         | 1 (Ref)          |         |
| -After discontinuation | 128           | 786          | 16.29 (13.70–19.38)                  | 1.42 (1.17–1.73) | 0.0005  | 1.40 (1.14–1.71) | 0.0013  |

d. Study patients with no abnormal clinical or vital signs during the study visits (among the excluded patients, patients with MACEs during administration are only included in the 'during administration' group)

| Last study drug stop   | No. of event | Person-years | Incidence rates per 100 person-years | IRR (95% CI)     | P-value | HR (95% CI)      | P-value |
|------------------------|--------------|--------------|--------------------------------------|------------------|---------|------------------|---------|
| <b>Total</b>           |              |              |                                      |                  |         |                  |         |
| -During administration | 448          | 7092         | 6.32 (5.76–6.93)                     | 1(Ref)           |         | 1(Ref)           |         |
| -After discontinuation | 64           | 942          | 6.79 (5.32–8.68)                     | 1.08 (0.83–1.40) | 0.5860  | 1.11 (0.84–1.48) | 0.4626  |
| <b>Within 1 month</b>  |              |              |                                      |                  |         |                  |         |
| -During administration | 448          | 7092         | 6.32 (5.76–6.93)                     | 1(Ref)           |         | 1(Ref)           |         |
| -After discontinuation | 19           | 62           | 30.54 (19.48–47.87)                  | 4.83 (3.05–7.65) | <0.0001 | 4.90 (3.08–7.80) | <0.0001 |
| <b>Within 3 months</b> |              |              |                                      |                  |         |                  |         |
| -During administration | 448          | 7092         | 6.32 (5.76–6.93)                     | 1(Ref)           |         | 1(Ref)           |         |
| -After discontinuation | 32           | 151          | 21.17 (14.97–29.93)                  | 3.35 (2.34–4.80) | <0.0001 | 3.42 (2.37–4.91) | <0.0001 |
| <b>Within 6 months</b> |              |              |                                      |                  |         |                  |         |
| -During administration | 448          | 7092         | 6.32 (5.76–6.93)                     | 1(Ref)           |         | 1(Ref)           |         |
| -After discontinuation | 47           | 260          | 18.09 (13.59–24.08)                  | 2.86 (2.12–3.87) | <0.0001 | 2.92 (2.16–3.96) | <0.0001 |

Supplementary Figure 3. Survival curves for MACE between during drug administration and after discontinuation under the assumption that participants who completed the trial did not have any MACE events.

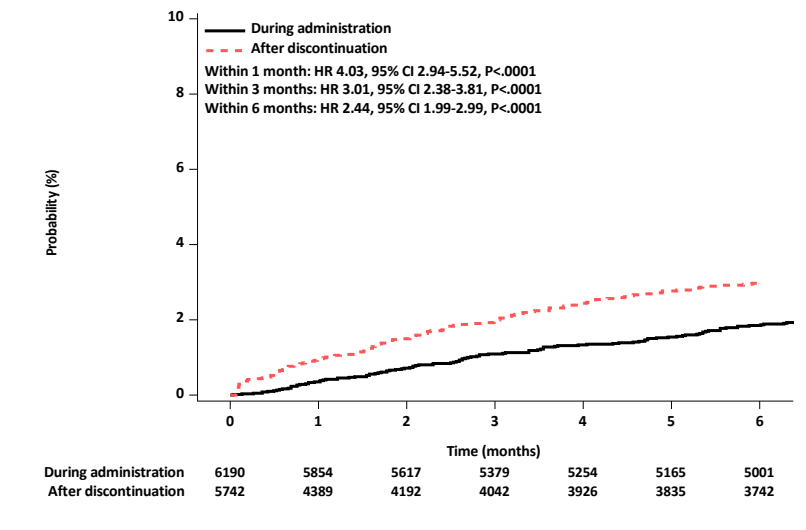

Supplementary Figure 4. Change in serum uric acid level based on the uric acid levels during and after drug administration

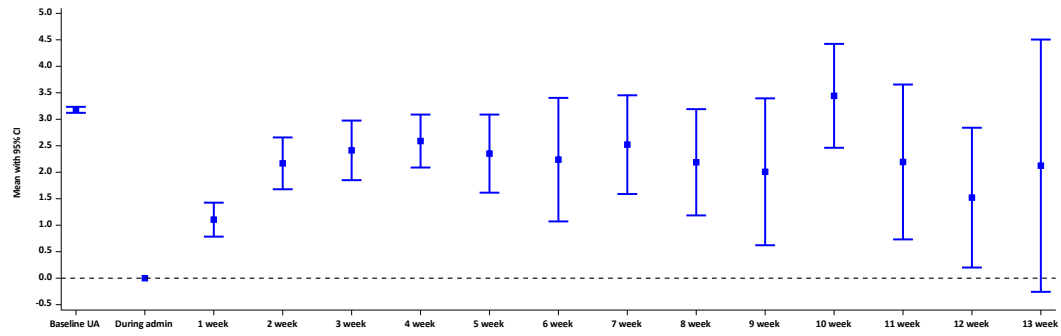

Supplementary Table 4. Baseline characteristics of patients with at least 1 year of drug administration according to MACE development after drug discontinuation after excluding patients with MACE during drug administration.

|                                          | CV event after discontinuation (n = 97) | No CV event after discontinuation (n = 3739) | P-value |
|------------------------------------------|-----------------------------------------|----------------------------------------------|---------|
| Treatment, n(%)                          |                                         |                                              | 0.2429  |
| Febuxostat                               | 54 (55.7)                               | 1857 (49.7)                                  |         |
| Allopurinol                              | 43 (44.3)                               | 1882 (50.3)                                  |         |
| Age, Mean±SD                             | 68.0 ± 9.1                              | 64.5 ± 8.3                                   | <.0001  |
| Age≥65, n (%)                            | 63 (64.9)                               | 1833 (49.1)                                  | 0.0020  |
| Male, n (%)                              | 81 (83.5)                               | 3168 (84.7)                                  | 0.7411  |
| Median body weight (Interquartile range) | 100.9 (87.0-113.4)                      | 97.1 (84.4-112.3)                            | 0.2032  |
| Body mass index, Mean ± SD               | 35.0 ± 8.8                              | 33.4 ± 6.8                                   | 0.0737  |
| Race or ethnic group, n(%)               |                                         |                                              | 0.0070  |
| White                                    | 81 (83.5)                               | 2585 (69.1)                                  |         |
| Black or African American                | 11 (11.3)                               | 629 (16.8)                                   |         |
| Others                                   | 5 (5.2)                                 | 525 (14.0)                                   |         |
| Smoker                                   |                                         |                                              | 0.1593  |
| Never smoked                             | 28 (28.9)                               | 1437 (38.4)                                  |         |
| Current smoker                           | 13 (13.4)                               | 443 (11.8)                                   |         |
| Ex-smoker                                | 56 (57.7)                               | 1859 (49.7)                                  |         |
| Drink                                    |                                         |                                              | 0.7139  |
| Never Drank                              | 23 (23.7)                               | 964 (25.8)                                   |         |
| Current Drinker                          | 46 (47.4)                               | 1829 (48.9)                                  |         |
| Ex-Drinker                               | 28 (28.9)                               | 946 (25.3)                                   |         |
| Baseline Glucose, Median (IQR)           | 118.0 (100.0-137.0)                     | 109.0 (97.0-134.0)                           | 0.0606  |
| Baseline LDL                             | 90.4 ± 37.8                             | 88.2 ± 35.2                                  | 0.5479  |
| Baseline SBP                             | 134.8 ± 17.7                            | 132.3 ± 16.8                                 | 0.1446  |
| Baseline DBP                             | 77.1 ± 12.0                             | 77.8 ± 10.6                                  | 0.4946  |
| Baseline Creatinine                      | 1.38 ± 0.36                             | 1.22 ± 0.32                                  | <.0001  |
| Stage of chronic kidney disease (eGFR)   |                                         |                                              | <.0001  |
| Stage 1 (90+)                            | 4 (4.1)                                 | 445 (11.9)                                   |         |
| Stage 2a (75-89)                         | 12 (12.4)                               | 726 (19.4)                                   |         |
| Stage 2b (60-74)                         | 17 (17.5)                               | 1083 (29.0)                                  |         |
| Stage 3a (45-59)                         | 29 (29.9)                               | 948 (25.4)                                   |         |
| Stage 3b (30-44)                         | 31 (32.0)                               | 497 (13.3)                                   |         |
| Stage 4 (15-29)                          | 4 (4.1)                                 | 38 (1.0)                                     |         |
| Baseline eGFR                            | 55.0 ± 17.8                             | 65.9 ± 18.6                                  | <.0001  |
| Baseline serum urate level, Mean±SD      | 9.4 ± 1.8                               | 8.7 ± 1.6                                    | <.0001  |
| Follow-up Uric Acid                      | 5.6 ± 1.7                               | 5.5 ± 1.7                                    | 0.6800  |
| Change from Baseline Uric Acid           | 3.8 ± 2.2                               | 3.1 ± 2.1                                    | 0.0011  |
| Baseline uroprotein                      |                                         |                                              | 0.0902  |
| Negative + Trace                         | 79 (81.4)                               | 3156 (84.9)                                  |         |
| +1                                       | 8 (8.2)                                 | 365 (9.8)                                    |         |
| +2 - +4                                  | 10 (10.3)                               | 196 (5.3)                                    |         |
| Duration of gout, Median (IQR)           | 6.3 (2.1-19.0)                          | 8.1 (3.1-18.0)                               | 0.5454  |

|                                                                                                                           |               |               |        |
|---------------------------------------------------------------------------------------------------------------------------|---------------|---------------|--------|
| Average sUA value for each subject collected from the end of the first year of treatment up-to 1 day after last dose date | 5.5 ± 1.3     | 5.5 ± 1.4     | 0.7959 |
| Median no. of gout flares (IQR)                                                                                           | 1.0 (0.0-3.0) | 1.0 (0.0-2.0) | 0.0132 |
| Presence of tophi, n(%)                                                                                                   | 25 (25.8)     | 799 (21.4)    | 0.2971 |
| Cardiovascular risk factors and history, n(%)                                                                             |               |               |        |
| DM with small-vessel disease                                                                                              | 37 (38.1)     | 1476 (39.5)   | 0.7911 |
| Hypertension                                                                                                              | 95 (97.9)     | 3435 (91.9)   | 0.0294 |
| Hyperlipidemia                                                                                                            | 84 (86.6)     | 3241 (86.7)   | 0.9811 |
| MI                                                                                                                        | 42 (43.3)     | 1360 (36.4)   | 0.1620 |
| Hospitalization for unstable angina                                                                                       | 29 (29.9)     | 969 (25.9)    | 0.3776 |
| Coronary revascularization                                                                                                | 48 (49.5)     | 1338 (35.8)   | 0.0056 |
| Cerebral revascularization                                                                                                | 4 (4.1)       | 70 (1.9)      | 1.0000 |
| Congestive heart failure                                                                                                  | 32 (33.0)     | 645 (17.3)    | <.0001 |
| Stroke                                                                                                                    | 14 (14.4)     | 480 (12.8)    | 0.6433 |
| Peripheral vascular disease                                                                                               | 20 (20.6)     | 419 (11.2)    | 0.0040 |
| Initial Prophylactic Medication                                                                                           |               |               | 0.3724 |
| Colchicine 0.6 mg QD                                                                                                      | 86 (88.7)     | 3144 (84.1)   |        |
| Naproxen 250 mg BID + PPI                                                                                                 | 6 (6.2)       | 395 (10.6)    |        |
| Other + None                                                                                                              | 5 (5.2)       | 200 (5.3)     |        |

Supplementary Table 5. Multivariable Cox regression analysis of MACE during administration in gout patients with more than 1 year of febuxostat or allopurinol administration

|                                                                | Unadjusted<br>HR (95% CI) | P-value       | Adjusted (N=4169)<br>HR (95% CI) | P-value       |
|----------------------------------------------------------------|---------------------------|---------------|----------------------------------|---------------|
| <b>Treatment</b>                                               |                           |               |                                  |               |
| Allopurinol                                                    | 1(Ref)                    |               | 1(Ref)                           |               |
| Febuxostat                                                     | 1.04 (0.85-1.28)          | 0.7132        | 1.06 (0.86-1.31)                 | 0.5658        |
| Age (per 10 unit increase)                                     | 1.32 (1.16-1.49)          | <.0001        | 1.17 (1.00-1.37)                 | 0.0524        |
| Male                                                           | 1.14 (0.84-1.56)          | 0.3987        | 1.06 (0.76-1.48)                 | 0.7447        |
| Body mass index                                                | 1.00 (0.99-1.02)          | 0.6898        | 1.01 (0.99-1.02)                 | 0.4475        |
| <b>Race or ethnic group</b>                                    |                           |               |                                  |               |
| White                                                          | 1(Ref)                    |               | 1(Ref)                           |               |
| Black or African American                                      | 0.78 (0.58-1.06)          | 0.1096        | 0.87 (0.63-1.19)                 | 0.3779        |
| Others                                                         | 0.37 (0.22-0.61)          | <.0001        | 0.55 (0.33-0.92)                 | 0.0219        |
| <b>Smoker</b>                                                  |                           |               |                                  |               |
| Never smoked                                                   | 1(Ref)                    |               | 1(Ref)                           |               |
| Current smoker                                                 | 1.00 (0.70-1.43)          | 0.9889        | 0.94 (0.64-1.37)                 | 0.7500        |
| Ex-smoker                                                      | 1.10 (0.88-1.38)          | 0.3833        | 0.91 (0.72-1.16)                 | 0.4546        |
| <b>Drink</b>                                                   |                           |               |                                  |               |
| Never Drank                                                    | 1(Ref)                    |               | 1(Ref)                           |               |
| Current Drinker                                                | 0.95 (0.73-1.23)          | 0.6873        | 1.09 (0.82-1.44)                 | 0.5492        |
| Ex-Drinker                                                     | 1.19 (0.90-1.59)          | 0.2198        | 1.21 (0.90-1.64)                 | 0.2117        |
| Baseline Glucose (per 10 unit increase)                        | 1.03 (1.01-1.05)          | 0.0125        | 1.04 (1.01-1.06)                 | 0.0060        |
| Baseline LDL (per 10 unit increase)                            | 1.04 (1.01-1.07)          | 0.0042        | 1.06 (1.03-1.09)                 | <.0001        |
| Baseline SBP (per 10 unit increase)                            | 1.10 (1.04-1.17)          | 0.0019        | 1.10 (1.02-1.19)                 | 0.0099        |
| Baseline DBP (per 10 unit increase)                            | 0.99 (0.90-1.10)          | 0.8960        | 0.97 (0.85-1.10)                 | 0.6188        |
| <b>Change in sUA levels<sup>a</sup> (per 1 mg/dL increase)</b> | <b>1.03 (0.98-1.08)</b>   | <b>0.3242</b> | <b>0.99 (0.95-1.04)</b>          | <b>0.8115</b> |
| <b>Stage of chronic kidney disease (eGFR)</b>                  |                           |               |                                  |               |
| Stage 1 (90+)                                                  | 1(Ref)                    |               | 1(Ref)                           |               |
| Stage 2a (75-89)                                               | 1.41 (0.84-2.36)          | 0.1956        | 1.24 (0.74-2.09)                 | 0.4187        |
| Stage 2b (60-74)                                               | 1.64 (1.01-2.65)          | 0.0459        | 1.26 (0.77-2.08)                 | 0.3528        |
| Stage 3a (45-59)                                               | 2.05 (1.27-3.31)          | 0.0032        | 1.39 (0.84-2.31)                 | 0.1956        |
| Stage 3b (30-44)                                               | 2.85 (1.74-4.66)          | <.0001        | 1.80 (1.06-3.08)                 | 0.0308        |
| Stage 4 (15-29)                                                | 3.08 (1.30-7.29)          | 0.0104        | 1.86 (0.75-4.60)                 | 0.1788        |
| <b>Baseline uroprotein</b>                                     |                           |               |                                  |               |
| Negative + Trace                                               | 1(Ref)                    |               | 1(Ref)                           |               |
| +1                                                             | 1.52 (1.12-2.06)          | 0.0069        | 1.29 (0.94-1.76)                 | 0.1136        |
| +2 - +4                                                        | 1.46 (0.95-2.23)          | 0.0814        | 1.06 (0.68-1.67)                 | 0.7937        |
| Duration of gout (per 10 unit increase)                        | 1.09 (1.00-1.18)          | 0.0570        | 1.07 (0.98-1.17)                 | 0.1066        |
| Presence of tophi                                              | 1.05 (0.82-1.35)          | 0.6865        | 1.06 (0.81-1.37)                 | 0.6884        |
| <b>Cardiovascular risk factors and history</b>                 |                           |               |                                  |               |
| DM with small-vessel disease                                   | 0.81 (0.65-1.01)          | 0.0639        | 0.83 (0.64-1.07)                 | 0.1526        |
| Hypertension                                                   | 1.46 (0.92-2.31)          | 0.1102        | 0.96 (0.60-1.55)                 | 0.8747        |
| Hyperlipidemia                                                 | 1.46 (1.00-2.12)          | 0.0477        | 0.98 (0.67-1.45)                 | 0.9342        |
| Myocardial infarction                                          | 1.89 (1.53-2.32)          | <.0001        | 1.51 (1.20-1.89)                 | 0.0004        |
| Hospitalization for unstable angina                            | 1.75 (1.42-2.17)          | <.0001        | 1.44 (1.15-1.81)                 | 0.0014        |



|                                 |                  |        |                  |        |
|---------------------------------|------------------|--------|------------------|--------|
| Coronary revascularization      | 1.99 (1.61-2.45) | <.0001 | 1.46 (1.15-1.85) | 0.0021 |
| Cerebral revascularization      | 1.73 (1.00-3.01) | 0.0519 | 1.35 (0.77-2.38) | 0.2991 |
| Congestive heart failure        | 2.21 (1.77-2.75) | <.0001 | 1.49 (1.16-1.90) | 0.0015 |
| Stroke                          | 1.77 (1.38-2.28) | <.0001 | 1.71 (1.32-2.23) | <.0001 |
| Peripheral vascular disease     | 1.68 (1.28-2.21) | 0.0002 | 1.51 (1.12-2.03) | 0.0061 |
| Initial Prophylactic Medication |                  |        |                  |        |
| Colchicine 0.6 mg QD            | 1(Ref)           |        | 1(Ref)           |        |
| Naproxen 250 mg BID + PPI       | 0.74 (0.51-1.08) | 0.1209 | 0.84 (0.57-1.24) | 0.3800 |
| Other + None                    | 0.54 (0.29-1.02) | 0.0571 | 0.52 (0.27-0.98) | 0.0425 |

<sup>a</sup>Change in sUA levels: determined the calculating the difference between baseline and last measured serum uric acid prior to drug discontinuation

DBP: diastolic blood pressure, DM: Diabetes mellitus, IQR: Interquartile range, LDL: low density lipoprotein, SBP: systolic blood pressure, sUA: serum uric acid.

Supplementary Figure 5. Time to death after last medication

a. All-cause death

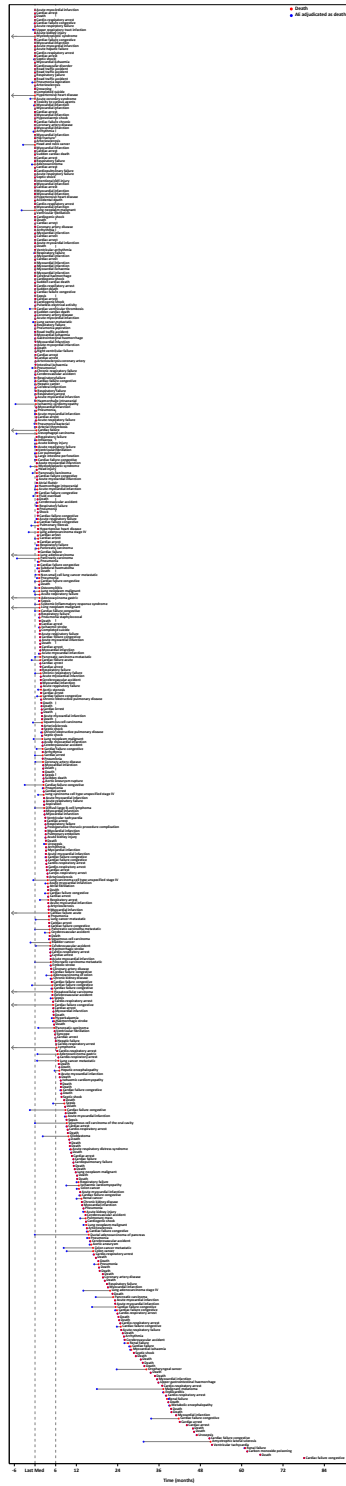



c. Non-CV death (during 6 months)

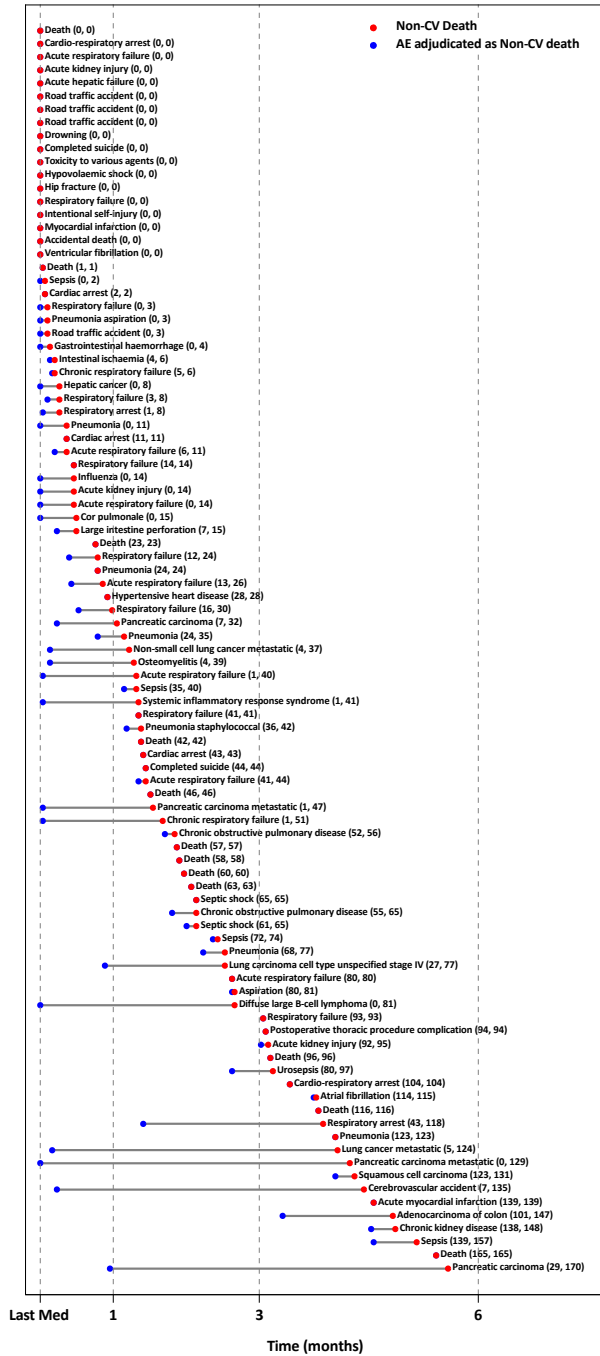

Supplementary Table 6. Comparative mortality between cardiovascular vs non-cardiovascular death (all study patients)

|                              | Total<br>(n = 442) | CV death<br>(n = 234) | Non-CV death<br>(n = 208) | P-value |
|------------------------------|--------------------|-----------------------|---------------------------|---------|
| Death within 1 month, n (%)  |                    |                       |                           | 0.0014  |
| No                           | 278 (62.9)         | 131 (56.0)            | 147 (70.7)                |         |
| Yes                          | 164 (37.1)         | 103 (44.0)            | 61 (29.3)                 |         |
| Death within 3 months, n (%) |                    |                       |                           | 0.0005  |
| No                           | 195 (44.1)         | 85 (36.3)             | 110 (52.9)                |         |
| Yes                          | 247 (55.9)         | 149 (63.7)            | 98 (47.1)                 |         |
| Death within 6 months, n (%) |                    |                       |                           | <0.0001 |
| No                           | 128 (29.0)         | 42 (17.9)             | 86 (41.3)                 |         |
| Yes                          | 314 (71.0)         | 192 (82.1)            | 122 (58.7)                |         |

Supplementary Table 7. Comparative mortality between cardiovascular vs non-cardiovascular death in patients with no abnormal clinical or vital signs during the study visits (excluding death induced by AEs, which occurred up to 1 day after last medication)

|                              | Total<br>(n = 123) | CV death<br>(n = 63) | Non-CV death<br>(n = 60) | P-value |
|------------------------------|--------------------|----------------------|--------------------------|---------|
| Death within 1 month, n (%)  |                    |                      |                          | 0.0191  |
| No                           | 111 (90.2)         | 53 (84.1)            | 58 (96.7)                |         |
| Yes                          | 12 (9.8)           | 10 (15.9)            | 2 (3.3)                  |         |
| Death within 3 months, n (%) |                    |                      |                          | 0.0470  |
| No                           | 86 (69.9)          | 39 (61.9)            | 47 (78.3)                |         |
| Yes                          | 37 (30.1)          | 24 (38.1)            | 13 (21.7)                |         |
| Death within 6 months, n (%) |                    |                      |                          | 0.0014  |
| No                           | 68 (55.3)          | 26 (41.3)            | 42 (70.0)                |         |
| Yes                          | 55 (44.7)          | 37 (58.7)            | 18 (30.0)                |         |

Supplementary Figure 6. Adverse events that occurred from 2 days after the last medication, adjudicated as death in patients with no abnormal clinical or vital signs during the study visits

a. Adverse events adjudicated as all-cause death

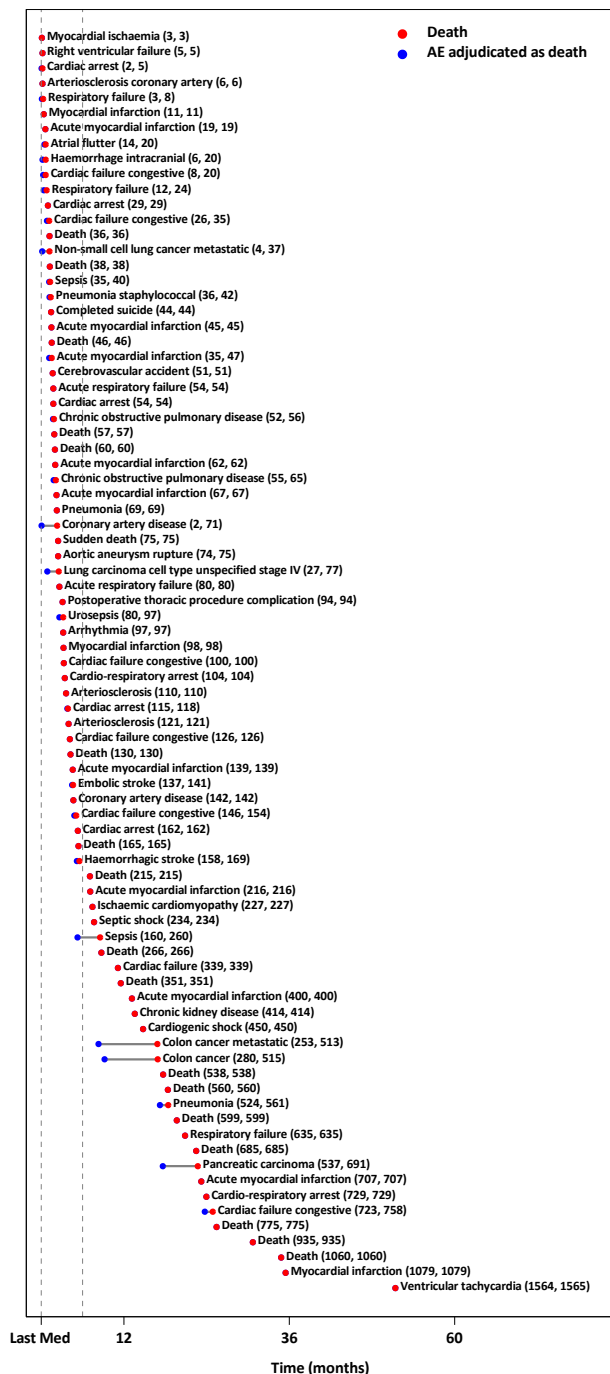

a. Adverse events adjudicated as cardiovascular death for 6 months

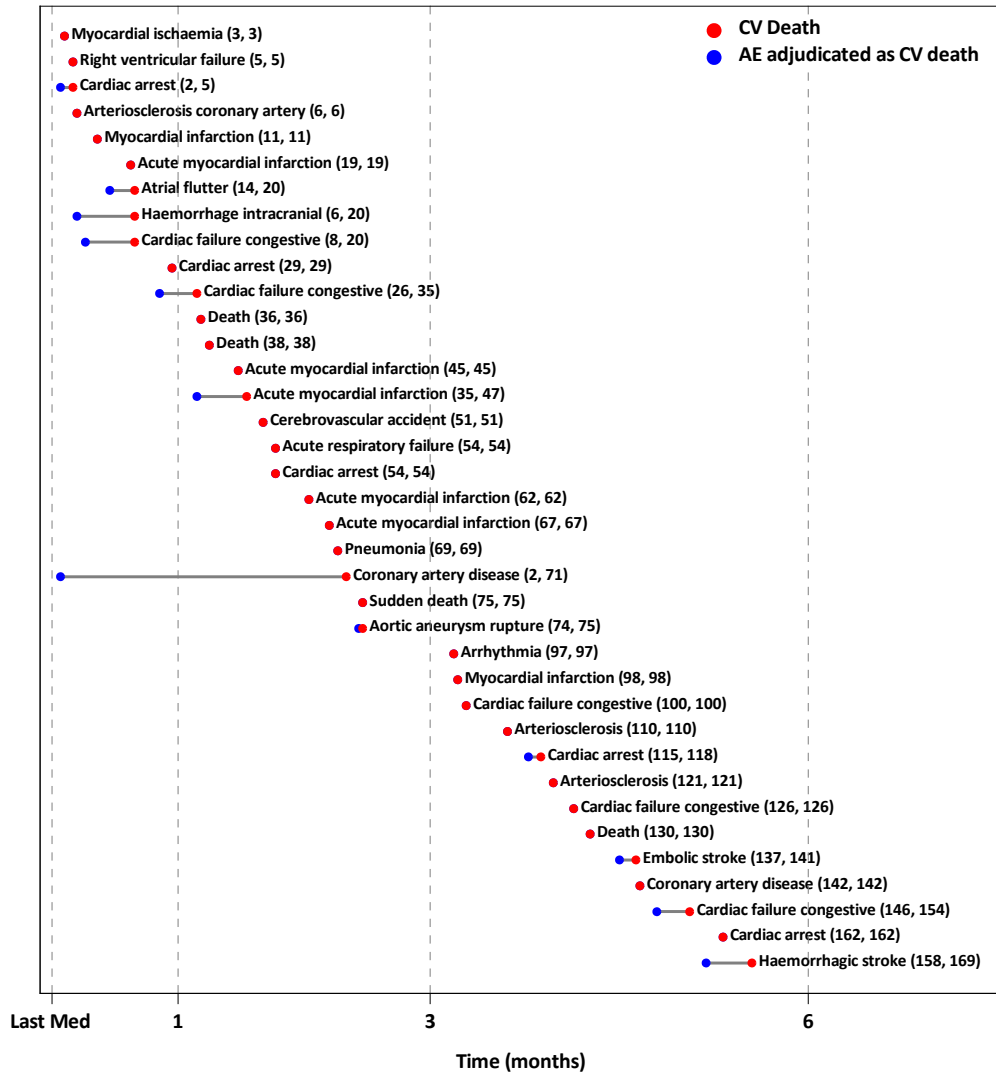

b. Adverse events adjudicated as non-cardiovascular death for 6 months

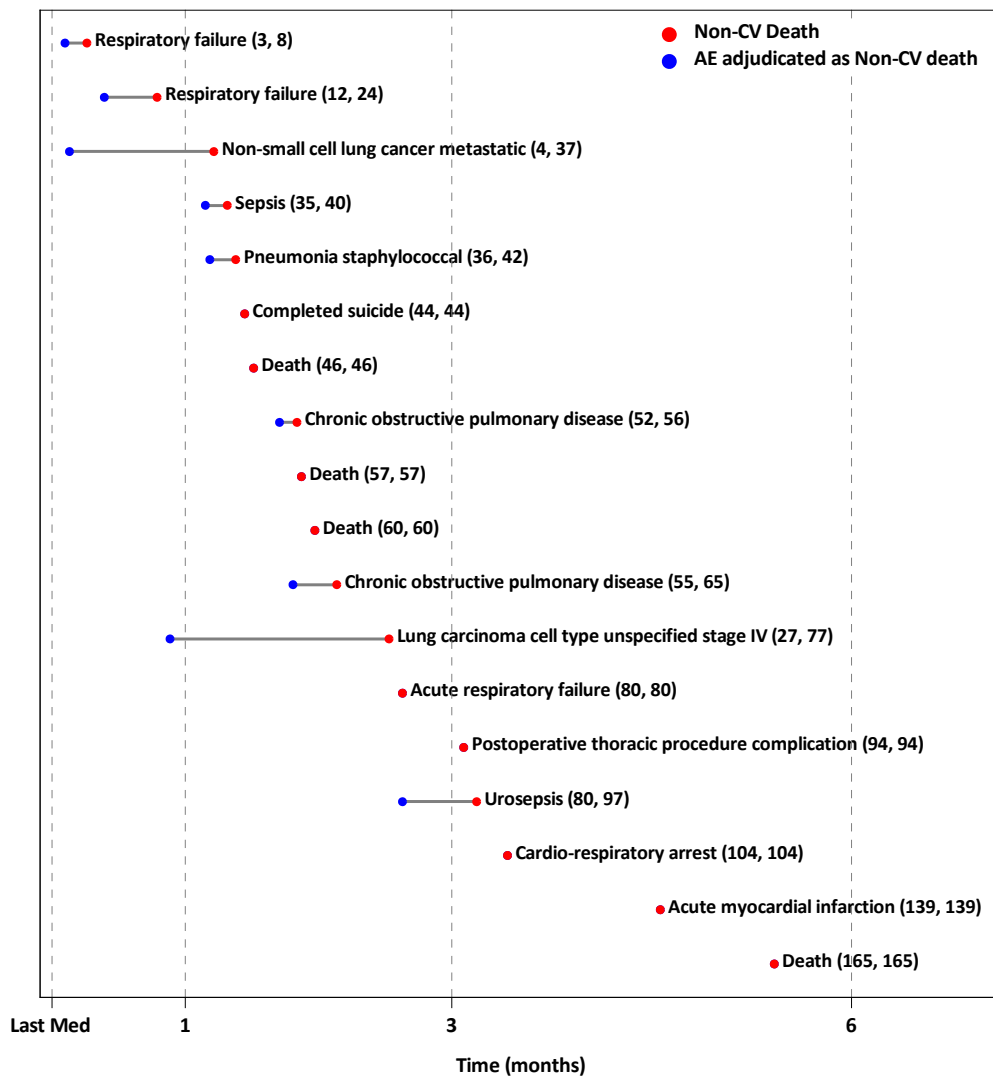



## c. Cumulative Kaplan–Meier estimates of the time to adverse events adjudicated as death

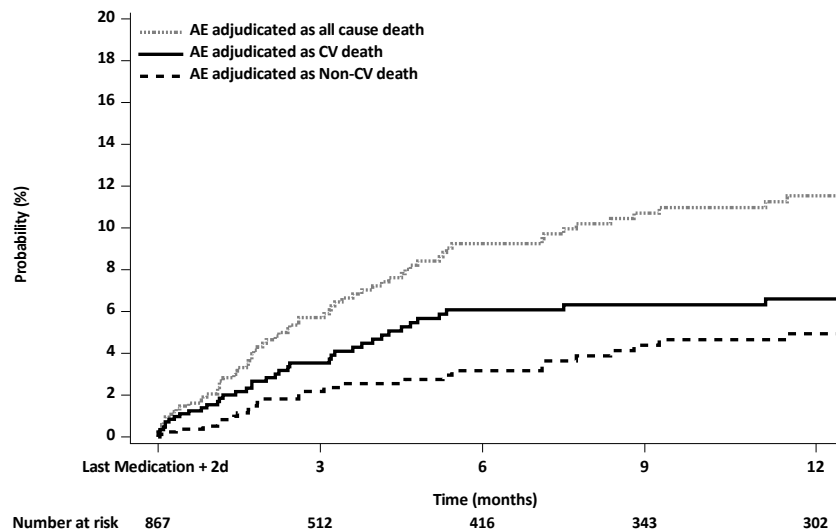

Supplementary Table 8. Comparative incidence of adverse events that occurred from 2 days after the last medication, adjudicated as between cardiovascular vs non-cardiovascular death in patients with no abnormal clinical or vital signs during the study visits.

|                              | Total<br>(n = 123) | CV death<br>(n = 63) | Non-CV death<br>(n = 60) | P-<br>value |
|------------------------------|--------------------|----------------------|--------------------------|-------------|
| Death within 1 month, n (%)  |                    |                      |                          | 0.0413      |
| No                           | 107 (87.0)         | 51 (81.0)            | 56 (93.3)                |             |
| Yes                          | 16 (13.0)          | 12 (19.0)            | 4 (6.7)                  |             |
| Death within 3 months, n (%) |                    |                      |                          | 0.0765      |
| No                           | 85 (69.1)          | 39 (61.9)            | 46 (76.7)                |             |
| Yes                          | 38 (30.9)          | 24 (38.1)            | 14 (23.3)                |             |
| Death within 6 months, n (%) |                    |                      |                          | 0.0026      |
| No                           | 67 (54.5)          | 26 (41.3)            | 41 (68.3)                |             |
| Yes                          | 56 (45.5)          | 37 (58.7)            | 19 (31.7)                |             |
